# Supplementary material for: From network to phenotype: the dynamic wiring of an Arabidopsis transcriptional network induced by osmotic stress
Source: PubMed Central journal article supplement (PMC5740496; doi:10.15252/msb.20177840), 2017-12-21
Supplement: MSB-13-961-s002.pdf [file MSB-13-961-s002.pdf]

## Expanded View Figures

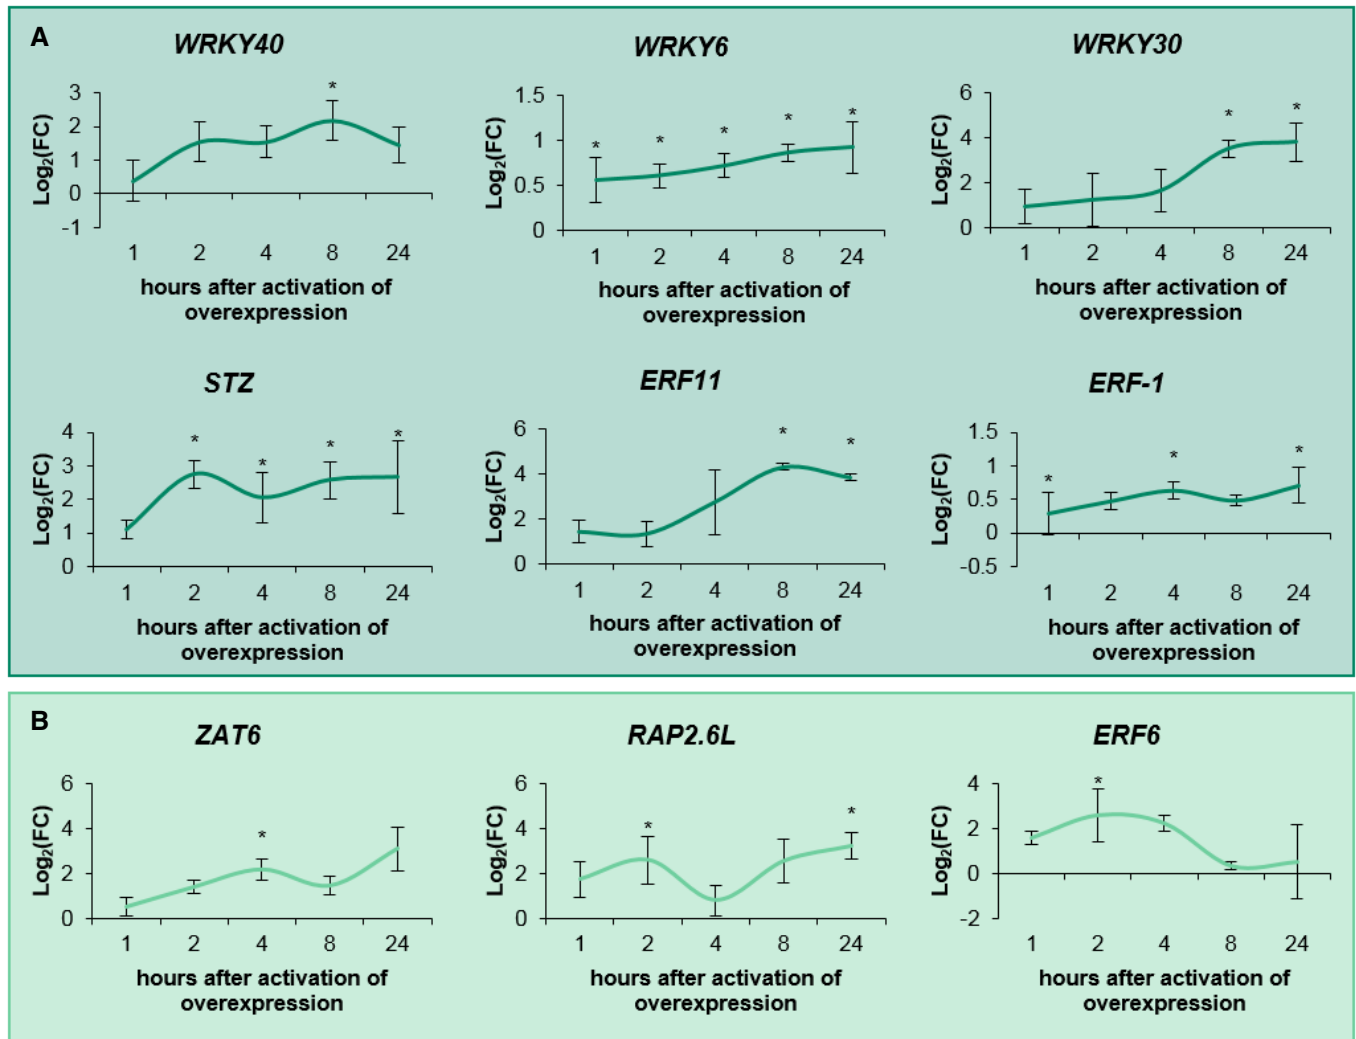

**Figure EV1.** Expression profiles of WRKY15 target genes.

Expanding leaf tissue (third leaf – 15 DAS) of WRKY15-GR was harvested 1 h, 2 h, 4 h, 8 h, and 24 h after transfer to dexamethasone. Expression values were normalized against the control line.

A WRKY15 target genes (significantly differentially expressed during one time point) that showed a gradually increasing expression pattern.

B WRKY15 target genes that showed an oscillating expression pattern.

Data information: data are presented as mean  $\pm$  SEM,  $n = 3$  independent experiments, \*FDR < 0.1 (mixed model analysis, user-defined Wald tests).

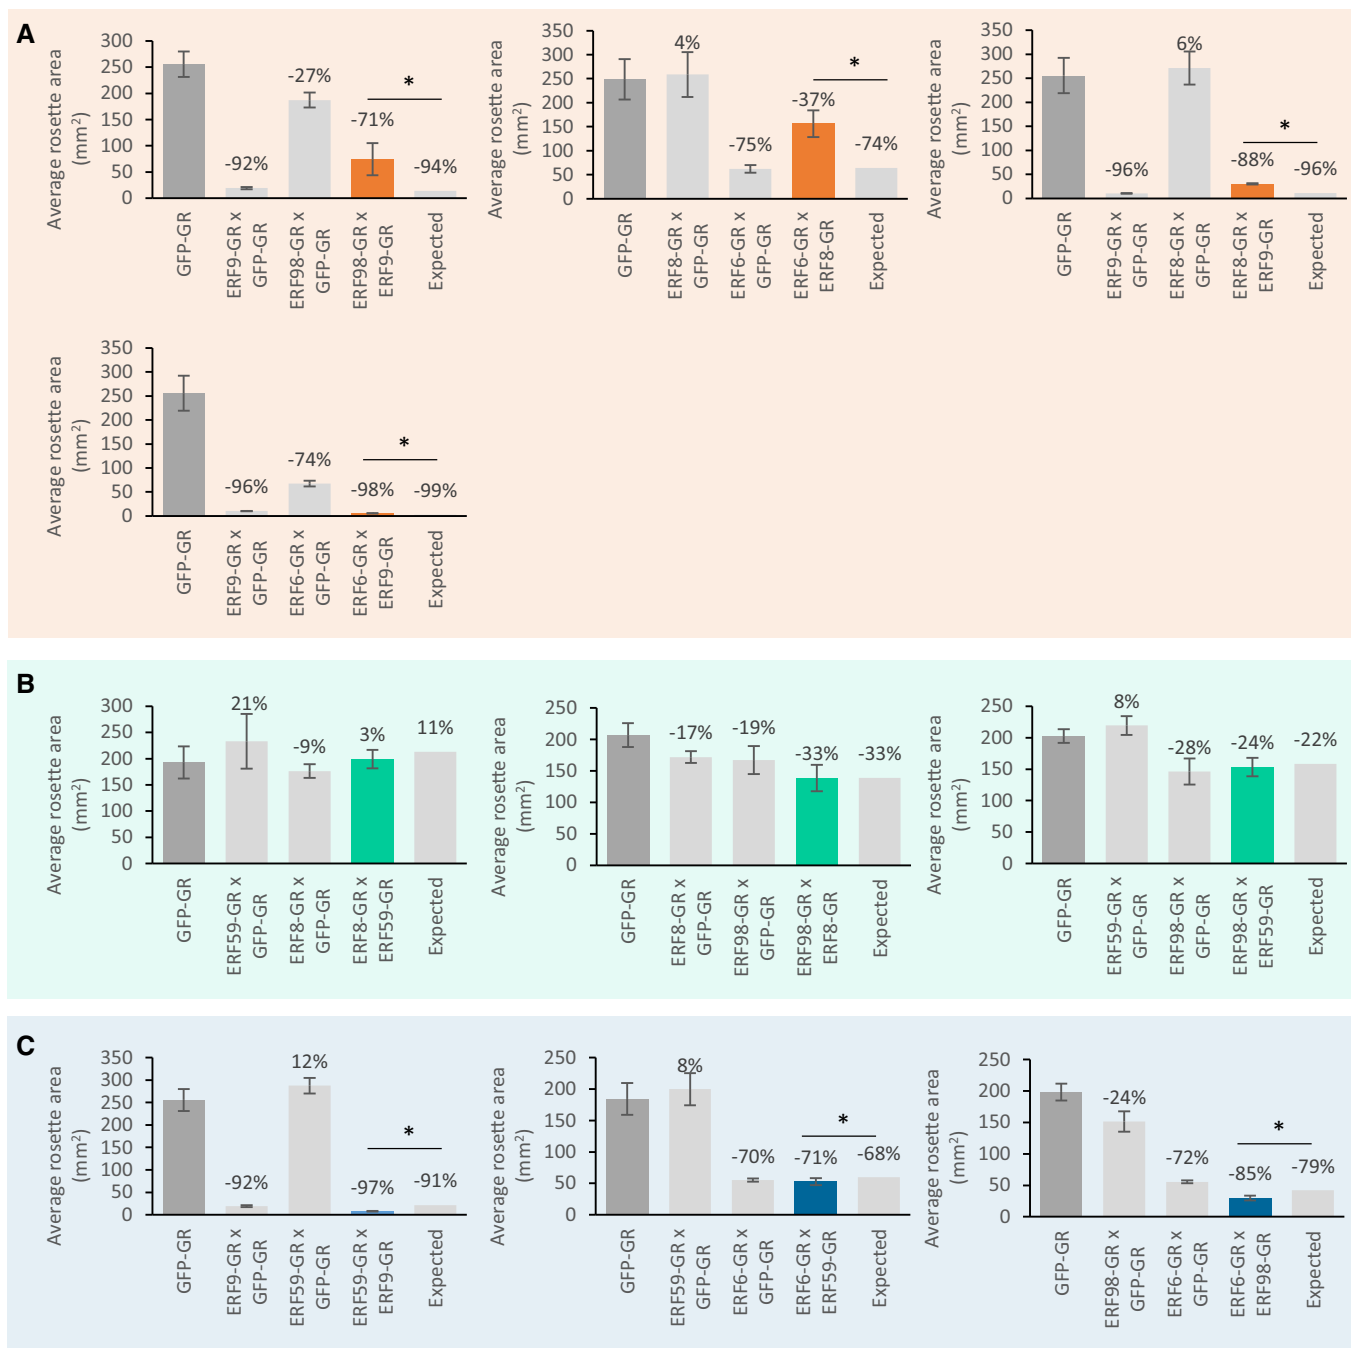

**Figure EV2. Phenotypic analysis of crosses between two GOF lines of the core network.**

A–C All members of the core network were crossed with either each other, referred to as double cross, or with the control line (GFP-GR), referred to as single cross and were germinated and grown on dexamethasone ( $n = 8$  plants). At 22 DAS, the projected rosette area of the double and single cross and the GFP-GR was measured. Double crosses resulted in a synergistic (A), an additive (B), or a negative (C) phenotype and are depicted in orange, green, and blue connection, respectively.

Data information: Data are presented as mean  $\pm$  SEM,  $n = 3$  independent experiments,  $*P < 0.05$ .
