# Supplementary material for: From network to phenotype: the dynamic wiring of an Arabidopsis transcriptional network induced by osmotic stress
Source: PubMed Central journal article supplement (PMC5740496; doi:10.15252/msb.20177840), 2017-12-21
Supplement: MSB-13-961-s003.pdf [file MSB-13-961-s003.pdf]

**Table EV1 - The induction of 20 genes encoding TFs upon mannitol-induced stress in expanding leaf tissue.**

The expression level of 20 genes encoding TFs was measured in wild-type plants at 15 DAS, 20 min, 40 min, 1 h, 2 h, 4 h, 8 h, 12 h, 16 h, 24 h and 48 h upon mannitol treatment in both control and mannitol conditions. Data information: Data are presented as mean  $\pm$  SEM, n = 4 independent experiments. FC = Fold change. FDR-corrected p-values, Student's t-test.

|                | 20'     |        | 40'     |        | 1h      |        | 2h      |        | 4h      |        | 8h      |        | 12h     |        | 16h     |        | 24h     |        | 48h     |        |
|----------------|---------|--------|---------|--------|---------|--------|---------|--------|---------|--------|---------|--------|---------|--------|---------|--------|---------|--------|---------|--------|
|                | Log(FC) | FDR    | Log(FC) | FDR    | Log(FC) | FDR    | Log(FC) | FDR    | Log(FC) | FDR    | Log(FC) | FDR    | Log(FC) | FDR    | Log(FC) | FDR    | Log(FC) | FDR    | Log(FC) | FDR    |
| <i>ERF-1</i>   | 0.13    | 0.8189 | 0.57    | 0.6942 | 1.62    | 0.0232 | 2.05    | 0.0182 | 1.14    | 0.0237 | 0.75    | 0.0242 | 0.71    | 0.0437 | 0.6     | 0.3341 | 0.62    | 0.0437 | 0.24    | 0.7208 |
| <i>ERF2</i>    | -0.23   | 0.8200 | 0.57    | 0.7636 | 1.64    | 0.0536 | 2.65    | 0.0212 | 2.34    | 0.0296 | 2.48    | 0.0455 | 2.12    | 0.0089 | 1.05    | 0.0373 | 1.28    | 0.0965 | 0.68    | 0.3948 |
| <i>ERF5</i>    | 0.62    | 0.6049 | 1.44    | 0.5054 | 3.9     | 0.0051 | 4.44    | 0.0107 | 3.99    | 0.0024 | 2.92    | 0.0009 | 2.88    | 0.0011 | 2.89    | 0.0032 | 3.52    | 0.0187 | 2.18    | 0.0094 |
| <i>ERF6</i>    | 0.29    | 0.9211 | 1.47    | 0.6395 | 3.8     | 0.0101 | 5.25    | 0.0162 | 4.04    | 0.0279 | 2.69    | 0.1021 | 0.96    | 0.1174 | 1.98    | 0.0498 | 2.47    | 0.0372 | 2.31    | 0.0867 |
| <i>ERF8</i>    | 0.15    | 0.7040 | 0.27    | 0.5759 | 0.39    | 0.1574 | 1.13    | 0.0028 | 0.94    | 0.0258 | 0.62    | 0.0115 | 0.5     | 0.0213 | 0.33    | 0.0743 | 0.28    | 0.4116 | 0.35    | 0.0638 |
| <i>ERF9</i>    | -0.02   | 0.9803 | -0.44   | 0.2742 | 0.04    | 0.9725 | 1.12    | 0.0801 | 0.64    | 0.0844 | 0.73    | 0.0743 | 1       | 0.0498 | 0.53    | 0.3601 | 0.86    | 0.0784 | 0.27    | 0.9067 |
| <i>ERF11</i>   | 0.37    | 0.8189 | 1.04    | 0.8189 | 3.77    | 0.0705 | 5.73    | 0.0202 | 6.22    | 0.0026 | 5.23    | 0.0100 | 3.66    | 0.0022 | 2.94    | 0.0182 | 4.32    | 0.0085 | 5.34    | 0.0015 |
| <i>ERF59</i>   | -1.05   | 0.2710 | -0.37   | 0.7892 | -0.92   | 0.6968 | 2.77    | 0.1487 | 3.17    | 0.0999 | 4.52    | 0.0715 | 4.87    | 0.0191 | 1.96    | 0.0437 | 2.25    | 0.2719 | 1.11    | 0.4966 |
| <i>ERF98</i>   | 2.19    | 0.1817 | 1.41    | 0.6017 | 4.87    | 0.0117 | 7.32    | 0.0007 | 6.32    | 0.0008 | 5.25    | 4.9E-5 | 5.58    | 0.0006 | 4.86    | 0.0004 | 3.97    | 0.0321 | 3.1     | 0.0245 |
| <i>RAP2.6L</i> | 0.26    | 0.9067 | 0.06    | 0.9834 | 0.12    | 0.9640 | 0.78    | 0.7635 | 5.32    | 0.0029 | 4.1     | 0.0167 | 4.24    | 0.0142 | 2.55    | 0.0793 | 3.71    | 0.0237 | 2.43    | 0.3890 |
| <i>WRKY6</i>   | -0.05   | 0.9067 | 0.07    | 0.6905 | 0.61    | 0.0236 | 1.81    | 0.0048 | 2.22    | 0.0082 | 1.96    | 0.0283 | 1.64    | 0.0117 | 1.29    | 0.0271 | 1.48    | 0.0022 | 1.1     | 0.0437 |
| <i>WRKY15</i>  | 0.05    | 0.8189 | 0.12    | 0.7635 | 0.7     | 0.0212 | 1.88    | 0.0324 | 1.71    | 0.0103 | 1.06    | 0.0518 | 1.1     | 0.0057 | 0.92    | 0.0165 | 1.03    | 0.0611 | 0.75    | 0.0616 |
| <i>WRKY28</i>  | 0.93    | 0.8635 | -0.11   | 0.7262 | 0.07    | 0.0182 | 1.33    | 0.0024 | 2.56    | 0.0042 | 3.47    | 0.0022 | 3.65    | 0.0004 | 2.7     | 0.0035 | 2.44    | 0.0057 | 1.05    | 0.0165 |
| <i>WRKY30</i>  | 0.34    | 0.9510 | 0.23    | 0.9364 | 2.07    | 0.3631 | 5.58    | 0.0163 | 6.41    | 0.0157 | 8.41    | 0.0018 | 5.55    | 0.0022 | 7.12    | 0.0237 | 4.78    | 0.0048 | 4.2     | 0.0261 |
| <i>WRKY33</i>  | 0.27    | 0.9510 | 0.86    | 0.9067 | 2.59    | 0.2297 | 3.91    | 0.0094 | 3.3     | 0.0147 | 2.46    | 0.0456 | 2.12    | 0.0031 | 1.95    | 0.0260 | 2.33    | 0.0022 | 1.69    | 0.0085 |
| <i>WRKY40</i>  | 0.27    | 0.7635 | 1.64    | 0.9767 | 3.03    | 0.9803 | 5.59    | 0.0904 | 5.19    | 0.0103 | 4.51    | 0.0212 | 2.38    | 0.0167 | 2.39    | 0.0995 | 2.86    | 0.0042 | 1.71    | 0.4712 |
| <i>WRKY48</i>  | 0.34    | 0.8635 | -0.5    | 0.9364 | 0.32    | 0.0743 | 2.99    | 0.0330 | 3.47    | 0.0023 | 3.89    | 0.0015 | 1.91    | 0.0004 | 1.08    | 0.0014 | 2.79    | 0.0057 | 2.44    | 0.0069 |
| <i>MYB51</i>   | 0.2     | 0.8411 | 0.62    | 0.6905 | 2.36    | 0.0212 | 3.83    | 0.0048 | 4.22    | 0.0048 | 3.69    | 0.0066 | 2.8     | 0.0022 | 1.62    | 0.0048 | 2.16    | 0.0051 | 1.52    | 0.0081 |
| <i>STZ</i>     | 0.21    | 0.8721 | 1.23    | 0.5501 | 4.01    | 0.0311 | 5.84    | 0.0227 | 5.01    | 0.0296 | 3.49    | 0.0264 | 2.12    | 0.0022 | 1.76    | 0.0182 | 2.93    | 0.0216 | 1.78    | 0.0118 |
| <i>ZAT6</i>    | 0.54    | 0.8635 | 1.38    | 0.8244 | 4.41    | 0.8635 | 5.11    | 0.1725 | 4.16    | 0.0801 | 4.02    | 0.0580 | 2.33    | 0.0692 | 2.07    | 0.3757 | 3.39    | 0.0082 | 2.29    | 0.0182 |
