# Supplementary material for: From network to phenotype: the dynamic wiring of an Arabidopsis transcriptional network induced by osmotic stress
Source: PubMed Central journal article supplement (PMC5740496; doi:10.15252/msb.20177840), 2017-12-21
Supplement: MSB-13-961-s004.pdf [file MSB-13-961-s004.pdf]

**Table EV2 – Overview of the phenotypic analysis of the 20 TFs under normal conditions.**

The outcome of the phenotypic analysis of the two or three independent GOF lines and the LOF line is given. A plus (+) and minus (-) represents a significant larger and smaller rosette area at 22DAS compared to the control, respectively. If no significant changes of the rosette area were observed a “0” is indicated and when a line was not present “NA” (Not Applicable) is indicated. The final outcome of the growth function of the TF is given considering that at least two independent GOF lines or the LOF line showed a growth phenotype and that the GOF and LOF lines did not show a contrasting growth-regulating function.

| Gene    | Phenotype GOF line |    |    | Phenotype LOF line | Growth function |
|---------|--------------------|----|----|--------------------|-----------------|
|         | #1                 | #2 | #3 |                    |                 |
| ERF-1   | -                  | +  | 0  | 0                  | Inconclusive    |
| ERF2    | +                  | 0  | NA | -                  | Activator       |
| ERF5    | 0                  | -  | NA | 0                  | Inconclusive    |
| ERF6    | -                  | -  | NA | 0                  | Repressor       |
| ERF8    | 0                  | 0  | 0  | +                  | Repressor       |
| ERF9    | -                  | -  | -  | 0                  | Repressor       |
| ERF11   | -                  | -  | NA | +                  | Repressor       |
| ERF59   | +                  | +  | 0  | 0                  | Activator       |
| ERF98   | -                  | -  | -  | 0                  | Repressor       |
| RAP2.6L | 0                  | 0  | NA | -                  | Activator       |
| STZ     | 0                  | 0  | NA | -                  | Activator       |
| ZAT6    | 0                  | 0  | NA | 0                  | None            |
| MYB51   | 0                  | 0  | NA | 0                  | None            |
| WRKY6   | NA                 | NA | NA | -                  | Activator       |
| WRKY15  | -                  | -  | -  | -                  | Inconclusive    |
| WRKY28  | -                  | 0  | NA | 0                  | Inconclusive    |
| WRKY30  | NA                 | NA | NA | +                  | Inconclusive    |
| WRKY33  | -                  | +  | 0  | 0                  | Inconclusive    |
| WRKY40  | NA                 | NA | NA | 0                  | Inconclusive    |
| WRKY48  | 0                  | NA | NA | 0                  | Inconclusive    |
